# Supplementary material for: Discovery of aspoquinolones A–D, prenylated quinoline-2-one alkaloids from Aspergillus nidulans, motivated by genome mining
Source: Royal Society of Chemistry journal article supplement (doi:10.1039/b607011f), 2006-01-01
Supplement: b607011f.pdf [file b607011f.pdf]

## Supplementary Material

### Discovery of Aspoquinolones A-D, Prenylated Quinoline-2-one Alkaloids from *Aspergillus nidulans*, Motivated by Genome Mining

Kirstin Scherlach and Christian Hertweck\*

Leibniz-Institute for Natural Product Research and Infection Biology, HKI, Beutenbergstr. 11a, 07745 Jena, Germany, and Friedrich-Schiller-University, Jena, Germany

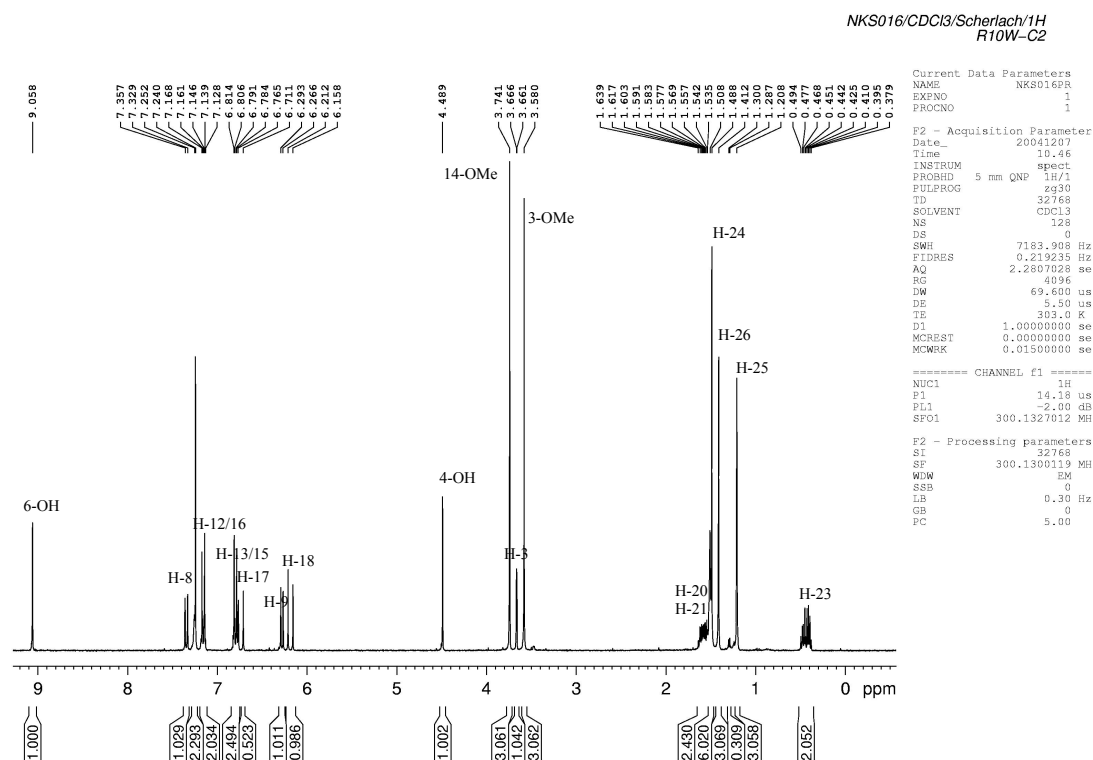

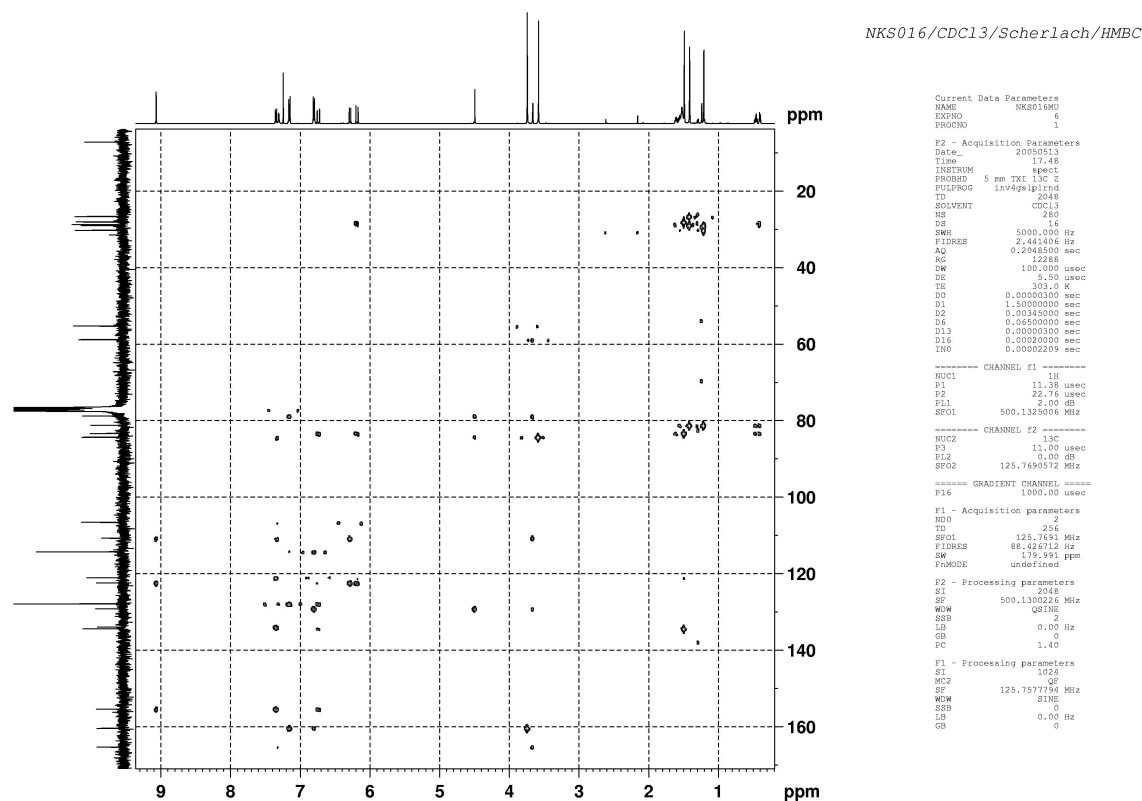

Fig S1: <sup>1</sup>H-NMR and HMBC spectra of aspoquinolone B

HMBC data for **1**, **2** and **3/4** in CDCl<sub>3</sub> (500MHz)

| Position | <b>1</b>                | <b>2</b>                | <b>3/4</b>              |
|----------|-------------------------|-------------------------|-------------------------|
| 1        | C3, C5                  | C3, C5                  | C3, C5                  |
| 2        | -                       | -                       | -                       |
| 3        | C2, C4, C5, C11, 3-OCH3 | C2, C4, C5, C11, 3-OCH3 | C2, C4, C5, C11, 3-OCH3 |
| 4        | -                       | -                       | -                       |
| 5        | -                       | -                       | -                       |
| 6        | -                       | -                       | -                       |
| 7        | -                       | -                       | -                       |
| 8        | C6, C10, C17            | C6, C10, C17            | C6, C10, C17            |
| 9        | C5, C7                  | C5, C7                  | C5, C7                  |
| 10       | -                       | -                       | -                       |
| 11       | -                       | -                       | -                       |
| 12       | C4, C14, C16            | C4, C14, C16            | C4, C14, C16            |
| 13       | C11, C14, C15           | C11, C14, C15           | C11, C14, C15           |
| 14       | -                       | -                       | -                       |
| 15       | C11, C13, C14           | C11, C13, C14           | C11, C13, C14           |
| 16       | C4, C12, C14            | C4, C12, C14            | C4, C12, C14            |
| 17       | C6, C8, C19             | C6, C8, C18, C19        | C6, C8, C19             |
| 18       | C7, C19, C24            | C7, C19, C24            | C7, C19, C20            |
| 19       | -                       | -                       | -                       |
| 20       | C22                     | C19, C24                | C18, C21, C22           |
| 21       | C19                     | C22, C25                | C19, C20, C22, C23      |
| 22       | -                       | -                       | -                       |
| 23       | C19, C20, C21, C22      | C19, C20, C21, C22      | -                       |
| 24       | C18, C19, C20           | C18, C19, C20           | C18, C19, C20           |
| 25       | C21, C22, C26           | C21, C22, C26           | C22, C23, C26           |
| 26       | C21, C22, C25           | C21, C22, C25           | C22, C23, C25           |
| 3-OCH3   | C3                      | C3                      | C3                      |
| 14-OCH3  | C14                     | C14                     | C14                     |
| 4-OH     | C3, C4, C11             | C3, C4, C11             | C3, C4, C11             |
| 6-OH     | C5, C6, C7              | C5, C6, C7              | C5, C6, C7              |

Table S1: HMBC data for **1-4**
